# Supplementary material
Source: PubMed Central journal article supplement (PMC5829970)
Supplement: DC172108SupplementaryData.pdf [file DC172108SupplementaryData.pdf]

SUPPLEMENTARY DATA

**Supplementary Table S1.** Characteristics of total study participants at the baseline examination

| Variables                                    | N   | Baseline value     |
|----------------------------------------------|-----|--------------------|
| Trimethylamine N-oxide (TMAO), $\mu\text{M}$ | 510 | 3.6 (3.3)          |
| median (25th, 75th) $\mu\text{M}$            |     | 2.7 (1.8, 3.8)     |
| Choline, $\mu\text{M}$                       | 510 | 9.0 (2.1)          |
| median (25th, 75th) $\mu\text{M}$            |     | 8.6 (7.4, 10.3)    |
| L-carnitine, $\mu\text{M}$                   | 510 | 34.9 (7.1)         |
| median (25th, 75th) $\mu\text{M}$            |     | 34.5 (30.0, 39.3)  |
| Age, y                                       | 510 | 51.5 (9.0)         |
| Female                                       | 510 | 324 [63.5%]        |
| White                                        | 510 | 413 [81.0%]        |
| Parental history of diabetes                 | 510 | 144 [28.2%]        |
| Current smoker                               | 510 | 13 [2.6%]          |
| Educational level                            | 510 |                    |
| High school or less                          | -   | 51 [10.0%]         |
| Some college                                 | -   | 104 [20.4%]        |
| College graduate or beyond                   | -   | 355 [69.6%]        |
| Marital status                               | 510 |                    |
| Married                                      | -   | 366 [71.8%]        |
| Divorced or separated                        | -   | 76 [14.9%]         |
| Widowed                                      | -   | 10 [2.0%]          |
| Never married                                | -   | 58 [11.4%]         |
| Diet group                                   | 510 |                    |
| High-protein diet                            | -   | 238 [46.7%]        |
| Low-fat diet                                 | -   | 268 [52.5%]        |
| Body mass index, $\text{kg}/\text{m}^2$      | 510 | 32.6 (3.8)         |
| Body weight, kg                              | 510 | 92.6 (15.3)        |
| Waist circumference, cm                      | 510 | 103 (13)           |
| Resting energy expenditure                   | 509 | 1543 (295)         |
| Body composition                             |     |                    |
| Trunk fat %                                  | 264 | 37.9 (5.8)         |
| Whole body total fat mass %                  | 264 | 37.1 (6.8)         |
| Body fat distribution                        |     |                    |
| Deep subcutaneous adipose tissue mass        | 121 | 5.6 (1.5)          |
| Superficial adipose tissue mass              | 104 | 10.7 (2.4)         |
| Visceral adipose tissue mass                 | 121 | 5.4 (2.5)          |
| Total adipose tissue mass                    | 104 | 16.1 (3.8)         |
| Fasting glucose, $\text{mmol}/\text{L}$      | 510 | 5.1 (0.7)          |
| HbA1c, %                                     | 509 | 5.4 (0.4)          |
| HbA1c, $\text{mmol}/\text{mol}$              | 509 | 36 (5)             |
| Hyperglycemia*, yes                          | 510 | 159 [31.2%]        |
| Fasting insulin, $\text{pmol}/\text{L}$      | 507 | 73.6 (48.6, 108.3) |
| HOMA-IR                                      | 507 | 2.9 (2.0)          |
| Dietary intake per day                       |     |                    |
| Energy, kcal                                 | 269 | 1998 (591)         |
| Carbohydrate, %**                            | 269 | 44.9 (7.6)         |
| Fat, %**                                     | 269 | 36.8 (5.9)         |
| Protein, %**                                 | 269 | 18.1 (3.2)         |

N, number of study participants. Data are mean (SD), median (25<sup>th</sup>, 75<sup>th</sup>), or N [% of the number of study participants]. \*Hyperglycemia was indicated by either fasting glucose  $\geq 5.6$   $\text{mmol}/\text{L}$  or HbA1c  $\geq 5.7\%$ . \*\* % of total energy intake.

SUPPLEMENTARY DATA

**Supplementary Table S2.** Changes in trimethylamine N-oxide (TMAO), choline and L-carnitine across different diets

|                                   | ΔTMAO      |                     | ΔCholine   |                     | ΔL-carnitine |                     |
|-----------------------------------|------------|---------------------|------------|---------------------|--------------|---------------------|
|                                   | Mean (SD)  | Median (25th, 75th) | Mean (SD)  | Median (25th, 75th) | Mean (SD)    | Median (25th, 75th) |
| 1) Low-fat diet group             | -0.1 (4.4) | 0.1 (-1.2, 1.5)     | -0.2 (1.9) | -0.1 (-1.2, 1.1)    | 0 (5.9)      | 0.5 (-3.2, 3.7)     |
| High-fat diet group               | -0.1 (4.2) | -0.2 (-1.2, 0.9)    | -0.2 (2.4) | -0.2 (-1.5, 0.8)    | -0.2 (5.8)   | 0 (-3.5, 3.0)       |
| 2) Low-protein diet group         | -0.2 (4.1) | 0 (-1.2, 1.0)       | -0.3 (2.0) | -0.2 (-1.4, 1.0)    | -0.2 (6.0)   | 0.2 (-3.8, 3.3)     |
| High-protein diet group           | 0 (4.6)    | 0 (-1.1, 1.5)       | -0.1 (2.4) | -0.1 (-1.3, 1.1)    | -0.1 (5.6)   | 0.3 (-2.9, 3.2)     |
| 3) Lowest-carbohydrate diet group | 0 (4.6)    | -0.2 (-1.1, 0.9)    | 0.1 (2.9)  | -0.1 (-1.5, 1.0)    | 0 (5.3)      | -0.1 (-3.2, 3.3)    |
| Highest-carbohydrate diet group   | -0.2 (4.3) | 0.1 (-1.4, 1.3)     | -0.2 (2.1) | 0 (-1.4, 1.1)       | 0.1 (5.9)    | 0.2 (-3.5, 4.0)     |

P > 0.05 for mean values using t test

P > 0.05 for median values using median test

**Supplementary Table S3.** Nutrient intake and biomarkers of adherence according to tertile categories of changes (Δ) in trimethylamine N-oxide (TMAO), choline and L-carnitine

|                 | At baseline  |                 |            |            |                      |                           | At 6 months  |                 |            |            |                      |                           |
|-----------------|--------------|-----------------|------------|------------|----------------------|---------------------------|--------------|-----------------|------------|------------|----------------------|---------------------------|
|                 | Energy, kcal | Carbohydrate, % | Fat, %     | Protein, % | Respiratory quotient | Urinary nitrogen (mg/day) | Energy, kcal | Carbohydrate, % | Fat, %     | Protein, % | Respiratory quotient | Urinary nitrogen (mg/day) |
| <b>ΔTMAO</b>    |              |                 |            |            |                      |                           |              |                 |            |            |                      |                           |
| Tertile (T) 1   | 1943 (589)   | 44.7 (7.3)      | 36.3 (5.4) | 18.4 (3.3) | 0.84 (0.04)          | 12.2 (4.0)                | 1583 (461)   | 49.9 (10.7)     | 31.4 (8.0) | 19.9 (4.4) | 0.84 (0.04)          | 11.0 (4.2)                |
| T2              | 2008 (591)   | 45.7 (7.6)      | 36.3 (5.6) | 18.0 (3.2) | 0.84 (0.04)          | 11.9 (4.4)                | 1597 (480)   | 52.0 (11.2)     | 28.8 (8.7) | 19.6 (4.6) | 0.84 (0.04)          | 11.1 (5.1)                |
| T3              | 2039 (596)   | 44.4 (7.9)      | 37.7 (6.5) | 17.9 (3.0) | 0.84 (0.04)          | 12.0 (4.2)                | 1639 (469)   | 52.0 (9.3)      | 29.6 (8.3) | 19.5 (3.8) | 0.84 (0.04)          | 11.7 (4.3)                |
| P-trend         | 0.15         | 0.69            | 0.09       | 0.28       | 0.07                 | 0.71                      | 0.52         | 0.22            | 0.23       | 0.51       | 0.87                 | 0.08                      |
| <b>ΔCholine</b> |              |                 |            |            |                      |                           |              |                 |            |            |                      |                           |
| T1              | 1935 (604)   | 44.9 (7.4)      | 37.0 (5.9) | 18.3 (3.3) | 0.84 (0.04)          | 11.7 (4.1)                | 1584 (475)   | 50.5 (10.3)     | 31.3 (8.7) | 19.8 (4.2) | 0.84 (0.05)          | 10.9 (4.5)                |
| T2              | 2015 (552)   | 44.5 (7.2)      | 37.3 (6.0) | 17.9 (2.8) | 0.84 (0.04)          | 12.2 (4.4)                | 1598 (496)   | 52.1 (11.1)     | 29.1 (8.9) | 19.8 (4.8) | 0.84 (0.04)          | 11.1 (4.4)                |
| T3              | 2052 (612)   | 45.3 (8.1)      | 36.3 (5.9) | 18.0 (3.4) | 0.84 (0.04)          | 12.2 (4.1)                | 1642 (439)   | 51.6 (9.9)      | 29.1 (7.3) | 19.3 (3.8) | 0.83 (0.04)          | 12.0 (4.7)                |
| P-trend         | 0.28         | 0.52            | 0.38       | 0.34       | 0.88                 | 0.14                      | 0.58         | 0.48            | 0.08       | 0.43       | 0.27                 | 0.02                      |

## SUPPLEMENTARY DATA

| $\Delta$ L-carnitine |               |            |            |            |             |            |            |             |            |            |             |            |
|----------------------|---------------|------------|------------|------------|-------------|------------|------------|-------------|------------|------------|-------------|------------|
| T1                   | 2005<br>(636) | 44.2 (7.3) | 37.4 (5.7) | 18.2 (3.2) | 0.84 (0.05) | 12.1 (4.6) | 1565 (431) | 50.7 (11.0) | 30.5 (8.7) | 19.5 (4.5) | 0.84 (0.05) | 10.9 (4.1) |
| T2                   | 1991<br>(535) | 44.9 (7.3) | 36.5 (6.0) | 18.4 (3.3) | 0.84 (0.04) | 12.1 (4.0) | 1548 (447) | 51.5 (10.7) | 29.7 (8.4) | 20.0 (4.0) | 0.84 (0.04) | 11.1 (4.4) |
| T3                   | 1996<br>(604) | 45.7 (8.1) | 36.5 (6.1) | 17.7 (2.9) | 0.84 (0.04) | 11.9 (4.0) | 1713 (517) | 51.9 (9.3)  | 29.5 (8.0) | 19.6 (4.2) | 0.84 (0.04) | 12.0 (5.0) |
| P-trend              | 0.97          | 0.25       | 0.38       | 0.31       | 0.39        | >0.99      | 0.01       | 0.45        | 0.44       | 0.85       | 0.82        | 0.007      |

Data are mean (SD) values. P-trend values were adjusted for age, sex, and ethnicity.

**Supplementary Table S4.** Changes ( $\Delta$ ) in obesity measurements and energy expenditure at 6 months per 1 log-transformed decreases in trimethylamine N-oxide (TMAO), choline and L-carnitine levels after further adjusted for fasting glucose levels at baseline and parental history of diabetes

| Outcomes                                             | $\Delta$ TMAO |          | $\Delta$ Choline |          | $\Delta$ L-carnitine |          |
|------------------------------------------------------|---------------|----------|------------------|----------|----------------------|----------|
|                                                      | $\beta$ (SE)  | <i>P</i> | $\beta$ (SE)     | <i>P</i> | $\beta$ (SE)         | <i>P</i> |
| $\Delta$ Body weight                                 | 0.56 (0.41)   | 0.18     | -7.67 (1.12)     | <0.0001  | -5.47 (1.45)         | <0.001   |
| $\Delta$ Waist circumference                         | 0.73 (0.44)   | 0.1      | -6.53 (1.22)     | <0.0001  | -4.56 (1.55)         | 0.003    |
| $\Delta$ Whole body total fat mass %                 | 0.80 (0.31)   | 0.01     | -2.73 (0.85)     | 0.002    | -1.77 (0.98)         | 0.07     |
| $\Delta$ Trunk fat %                                 | 1.11 (0.42)   | 0.01     | -3.66 (1.13)     | 0.001    | -2.51 (1.32)         | 0.06     |
| $\Delta$ Deep subcutaneous adipose tissue mass, DSAT | 0.25 (0.15)   | 0.09     | -1.04 (0.39)     | 0.01     | -0.82 (0.43)         | 0.06     |
| $\Delta$ Superficial adipose tissue mass, SAT        | 0.57 (0.29)   | 0.06     | -1.95 (0.76)     | 0.01     | -0.75 (0.77)         | 0.34     |
| $\Delta$ Visceral adipose tissue mass, VAT           | 0.22 (0.16)   | 0.17     | -0.98 (0.42)     | 0.02     | -0.70 (0.46)         | 0.14     |
| $\Delta$ Total adipose tissue mass, TAT              | 0.96 (0.46)   | 0.04     | -3.28 (1.20)     | 0.008    | -1.54 (1.20)         | 0.2      |
| $\Delta$ Resting energy expenditure                  | -13.8 (10)    | 0.17     | -71.3 (28)       | 0.01     | -35.7 (35.5)         | 0.32     |

$\beta$  (SE) represents changes in the outcomes when the circulating metabolite levels were decreased during the diet intervention.

Data after adjusted for age, sex, diet group, BMI, fasting glucose, parental history of diabetes, value for the respective outcome traits at the baseline examination (except for the outcome  $\Delta$ body weight), and either TMAO, choline, or L-carnitine at baseline.

SUPPLEMENTARY DATA

**Supplementary Table S5.** Changes ( $\Delta$ ) in obesity measurements and energy expenditure at 6 months per 1 log-transformed decreases in trimethylamine N-oxide (TMAO), choline and L-carnitine levels according to the baseline diabetes risk status\*

| Outcomes                                     | Normoglycemia* |              |          |              |          |              |          | Hyperglycemia* |             |          |             |          |              |          | <i>P</i> <sub>interaction(ΔTMAO*hyperglycemia)‡</sub> | <i>P</i> <sub>interaction(ΔCholine*hyperglycemia)‡</sub> | <i>P</i> <sub>interaction(ΔL-carnitine*hyperglycemia)‡</sub> |
|----------------------------------------------|----------------|--------------|----------|--------------|----------|--------------|----------|----------------|-------------|----------|-------------|----------|--------------|----------|-------------------------------------------------------|----------------------------------------------------------|--------------------------------------------------------------|
|                                              | N†             | ΔTMAO        |          | ΔCholine     |          | ΔL-carnitine |          | N†             | ΔTMAO       |          | ΔCholine    |          | ΔL-carnitine |          |                                                       |                                                          |                                                              |
|                                              |                | β (SE)       | <i>P</i> | β (SE)       | <i>P</i> | β (SE)       | <i>P</i> |                | β (SE)      | <i>P</i> | β (SE)      | <i>P</i> | β (SE)       | <i>P</i> |                                                       |                                                          |                                                              |
| ΔBody weight                                 | 351            | 0.37 (0.5)   | 0.46     | -8.21 (1.43) | <.0001   | -7 (1.82)    | 0.0001   | 159            | 1.15 (0.77) | 0.14     | 6.75 (1.86) | 0.0004   | 2.47 (2.41)  | 0.31     | 0.6                                                   | 0.53                                                     | 0.3                                                          |
| ΔWaist circumference                         | 350            | 0.69 (0.52)  | 0.19     | -8.25 (1.53) | <.0001   | -6.73 (1.94) | 0.0006   | 159            | 0.95 (0.8)  | 0.24     | 3.58 (2.05) | 0.08     | 0.33 (2.56)  | 0.9      | 0.61                                                  | 0.06                                                     | 0.18                                                         |
| ΔWhole body total fat mass %                 | 171            | 0.6 (0.37)   | 0.11     | -3.51 (1.1)  | 0.002    | -2.54 (1.28) | 0.049    | 62             | 1.34 (0.53) | 0.01     | 1.93 (1.33) | 0.15     | 0.54 (1.47)  | 0.71     | 0.98                                                  | 0.22                                                     | 0.45                                                         |
| ΔTrunk fat %                                 | 171            | 0.77 (0.5)   | 0.13     | -4.43 (1.46) | 0.003    | -3.32 (1.72) | 0.06     | 62             | 2.09 (0.71) | 0.005    | 3.11 (1.77) | 0.08     | 1.14 (2.01)  | 0.57     | 0.73                                                  | 0.2                                                      | 0.45                                                         |
| ΔDeep subcutaneous adipose tissue mass, DSAT | 73             | 0.16 (0.19)  | 0.4      | -1.4 (0.52)  | 0.01     | -0.88 (0.62) | 0.17     | 31             | 0.24 (0.26) | 0.37     | 1.29 (0.6)  | 0.04     | 0.33 (0.63)  | 0.6      | 0.39                                                  | 0.16                                                     | 0.59                                                         |
| ΔSuperficial adipose tissue mass, SAT        | 57             | 0.55 (0.3)   | 0.07     | -1.95 (1.15) | 0.1      | -0.33 (1.16) | 0.78     | 26             | 0.36 (0.66) | 0.59     | 2.34 (1.15) | 0.06     | 0.81 (1.19)  | 0.5      | 0.88                                                  | 0.92                                                     | 0.59                                                         |
| ΔVisceral adipose tissue mass, VAT           | 73             | 0.26 (0.2)   | 0.19     | -0.9 (0.58)  | 0.13     | -0.38 (0.67) | 0.57     | 32             | 0.17 (0.3)  | 0.59     | 1.82 (0.69) | 0.01     | -0.6 (0.73)  | 0.42     | 0.65                                                  | 0.96                                                     | 0.76                                                         |
| ΔTotal adipose tissue mass, TAT              | 57             | 1.06 (0.49)  | 0.04     | -2.78 (1.96) | 0.16     | -0.69 (1.91) | 0.72     | 26             | 0.61 (1.05) | 0.57     | 4.21 (1.73) | 0.03     | -1.4 (1.88)  | 0.47     | 0.64                                                  | 0.98                                                     | 0.61                                                         |
| ΔResting energy expenditure                  | 331            | -12.5 (11.7) | 0.29     | -67 (34.9)   | 0.06     | -81.4 (43.4) | 0.06     | 146            | -6.4 (20)   | 0.75     | 81.5 (49.1) | 0.1      | 48.0 (62.7)  | 0.44     | 0.87                                                  | 0.83                                                     | 0.18                                                         |

## SUPPLEMENTARY DATA

\*The baseline diabetes risk status was indicated by the presence of hyperglycemia (hyperglycemia: impaired fasting glucose  $\geq 5.5$  mmol/L or elevated HbA1c levels  $\geq 5.7\%$ ) at the baseline examination.

† N, Number of participants eligible for the analysis

‡ P values for interactions between changes in each metabolite ( $\Delta$ TMAO,  $\Delta$ Choline, or  $\Delta$ L-carnitine) and the presence of hyperglycemia for the outcomes

**Supplementary Table S6.** Long-term changes in obesity measurements based on per 1 log-transformed initial decreases in trimethylamine N-oxide (TMAO), choline and L-carnitine concentrations

| Outcomes                                             | $\Delta$ TMAO |      | $\Delta$ Choline |        | $\Delta$ L-carnitine |        |
|------------------------------------------------------|---------------|------|------------------|--------|----------------------|--------|
|                                                      | $\beta$ (SE)  | P    | $\beta$ (SE)     | P      | $\beta$ (SE)         | P      |
| At 12 months                                         |               |      |                  |        |                      |        |
| $\Delta$ Body weight                                 | 0.83 (0.54)   | 0.13 | -9.35 (1.45)     | <.0001 | -6.64 (1.88)         | 0.0004 |
| $\Delta$ Waist circumference                         | 1.41 (0.57)   | 0.01 | -7.66 (1.57)     | <.0001 | -5.12 (1.99)         | 0.01   |
| At 18 months                                         |               |      |                  |        |                      |        |
| $\Delta$ Body weight                                 | 0.66 (0.57)   | 0.24 | -9.38 (1.55)     | <.0001 | -6.95 (1.99)         | 0.0005 |
| $\Delta$ Waist circumference                         | 1.00 (0.61)   | 0.1  | -9.11 (1.67)     | <.0001 | -6.57 (2.13)         | 0.002  |
| At 24 months                                         |               |      |                  |        |                      |        |
| $\Delta$ Body weight                                 | 1.00 (0.55)   | 0.07 | -7.14 (1.53)     | <.0001 | -4.41 (1.94)         | 0.02   |
| $\Delta$ Waist circumference                         | 1.21 (0.57)   | 0.04 | -5.60 (1.62)     | 0.0006 | -3.22 (2.04)         | 0.11   |
| $\Delta$ Whole body total fat mass %                 | 0.24 (0.42)   | 0.57 | -3.49 (1.04)     | 0.001  | -1.88 (1.3)          | 0.15   |
| $\Delta$ Trunk fat %                                 | 0.39 (0.54)   | 0.48 | -4.84 (1.32)     | 0.0003 | -2.89 (1.66)         | 0.08   |
| $\Delta$ Deep subcutaneous adipose tissue mass, DSAT | 0.09 (0.22)   | 0.67 | -0.55 (0.51)     | 0.28   | -0.73 (0.51)         | 0.16   |
| $\Delta$ Superficial adipose tissue mass, SAT        | 0.16 (0.42)   | 0.7  | -1.06 (0.84)     | 0.21   | -0.91 (0.82)         | 0.27   |
| $\Delta$ Visceral adipose tissue mass, VAT           | 0.28 (0.23)   | 0.22 | -1.12 (0.55)     | 0.046  | -0.40 (0.56)         | 0.48   |
| $\Delta$ Total adipose tissue mass, TAT              | 0.53 (0.66)   | 0.42 | -1.90 (1.33)     | 0.16   | -1.40 (1.3)          | 0.29   |

$\beta$  (SE) represents changes in the outcomes when the circulating metabolite levels were decreased during the intervention.

Data after adjusted for age, sex, diet group, BMI, value for the respective outcome traits at the baseline examination (except for the outcome  $\Delta$ body weight), and either TMAO, choline or L-carnitine at baseline.
